# Supplementary material for: Is the Clinical Course of Non-Arteritic Ischemic Optic Neuropathy Associated with Oxidative Damage and the Dynamics of the Antioxidant Response?
Source: Research Square preprint supplement (doi:10.21203/rs.3.rs-1145784/v1), 2022-01-10
Supplement: Supplementary file 1 [file 2538745f110ebb93a5dbb848.docx]

**Is the Clinical Course of Non-Arteritic Ischemic Optic Neuropathy Associated with Oxidative Damage and the Dynamics of the Antioxidant Response?** Int Ophthalmol.

Engin KN, Harmancı Karagülle D, Durmaz Engin C, Kant M, Yaman A, Akış M, Özel Yıldız S, İşlekel H, Güner Akdoğan G, Söylev Bajin M.

**Corresponding Author:** Kaya Nusret Engin, kayanengin@hotmail.com

Sağlık University, Ümraniye Education and Research Hospital, Department of Ophthalmology. Istanbul/Turkey

|  |  | Female | Male | p |
| --- | --- | --- | --- | --- |
| Cholesterol† | Mean ± Std. Dev. (n) | 214,5±55,96(16) | 198,06±33,13(16) | 0,32 |
| Glucose†† | Mean ± Std. Dev. (n) | 91,47±24,17(15) | 102,07±44,66(15) | 0,678 |
| Median (25th– 75th Perc.) | 88(75-106) | 91(80-106) |
| TGSH† | Mean ± Std. Dev. (n) | 0,048±0,016(17) | 0,052±0,019(16) | 0,537 |
| GSH† | Mean ± Std. Dev. (n) | 0,029±0,011(17) | 0,035±0,014(16) | 0,177 |
| SOD† | Mean ± Std. Dev. (n) | 20,94±10,29(17) | 23,94±9,91(16) | 0,4 |
| A† | Mean ± Std. Dev. (n) | 1012,31±270,21(17) | 1092,47±249,54(16) | 0,384 |
| B12† | Mean ± Std. Dev. (n) | 225,67±87,86(15) | 196,2±84,44(15) | 0,357 |
| C† | Mean ± Std. Dev. (n) | 0,086±0,044(17) | 0,06±0,0199(16) | 0,035* |
| E† | Mean ± Std. Dev. (n) | 22,88±10,33(17) | 21,18±6,33(16) | 0,578 |
| Folate†† | Mean ± Std. Dev. (n) | 9,31±5,06(16) | 9,61±5,19(16) | 0,955 |
| Median (25th– 75th Perc.) | 8,86(6,56-10,93) | 8,85(5,58-11,18) |
| Cp†† | Mean ± Std. Dev. (n) | 21,11±3,68(15) | 19,22±4,27(17) | 0,199 |
| Uric acid† | Mean ± Std. Dev. (n) | 4,92±1,27(16) | 5,75±0,91(16) | 0,044* |
| MDA† | Mean ± Std. Dev. (n) | 3,17±1,09(16) | 2,91±0,64(16) | 0,426 |
| MMA†† | Mean ± Std. Dev. (n) | 0,24±0,18(12) | 0,29±0,27(15) | 1,000 |
| Median (25th– 75th Perc.) | 0,16(0,13-,33) | 0,15(0,11-0,45) |
| 8-OHdG†† | Mean ± Std. Dev. (n) | 18,17±10,45(13) | 18,13±9,76(15) | 0,106 |
| Median (25th– 75th Perc.) | 17,92(9,76-25,86) | 9,09(4,95-16,25) |

ESM_1: Comparison of oxidative stress parameters according to gender in patient group. Cholesterol (mg/dL), Glucose (mg/dL), tGSH: Total glutathione (mmol/L), GSH: Reduced glutathione, (mmol/L), SOD: Superoxide dismutase (µmol/mg), A: Vitamin A (µg/L), B12: Vitamin B12 (pg/mL), C: Vitamin C (ng/µL), E: Vitamin E (µg/L), Folate (ng/mL), Cp: Ceruloplasmin (mg/dL), Uric acid (µg/L), MMA: Methylmalonic acid (µmol/L), MDA: Malonyl dialdehyde (µmol/L), 8-OHdG: 8-hydroxy-2’-deoxyguanosine/Creatinine (nmol/mmol), p: 2-tailed p value, † t-test, †† Mann-Whitney U Test, p: 2-tailed p value, n: Number of samples, * p<0,05.
