# Supplementary material for: Is the Clinical Course of Non-Arteritic Ischemic Optic Neuropathy Associated with Oxidative Damage and the Dynamics of the Antioxidant Response?
Source: Research Square preprint supplement (doi:10.21203/rs.3.rs-1145784/v1), 2022-01-10
Supplement: Supplementary file 2 [file ef065ff0166f03008bee5b34.docx]

**Is the Clinical Course of Non-Arteritic Ischemic Optic Neuropathy Associated with Oxidative Damage and the Dynamics of the Antioxidant Response?** Int Ophthalmol.

Engin KN, Harmancı Karagülle D, Durmaz Engin C, Kant M, Yaman A, Akış M, Özel Yıldız S, İşlekel H, Güner Akdoğan G, Söylev Bajin M.

**Corresponding Author:** Kaya Nusret Engin, kayanengin@hotmail.com

Sağlık University, Ümraniye Education and Research Hospital, Department of Ophthalmology. Istanbul/Turkey

|  | | Vision | C Vs | IOP | c/d | RNFL | MT | Glu |
| --- | --- | --- | --- | --- | --- | --- | --- | --- |
| Age | rs | ,405* | -,582** | ,112 | ,086 | -,205 | ,075 | ,241 |
| p | ,019 | ,000 | ,533 | ,636 | ,253 | ,679 | ,199 |
|  | n | 33 | 33 | 33 | 33 | 33 | 33 | 30 |
| Vision | rs | 1,000 | -,633** | ,207 | ,143 | -,601** | -,151 | ,252 |
| p | ,000 | ,247 | ,429 | ,000 | ,401 | ,179 |
|  | n | 33 | 33 | 33 | 33 | 33 | 30 |
| C Vs | rs | -,633** | 1,000 | -,108 | -,211 | ,314 | ,106 | -,344 |
| p | ,000 | ,548 | ,239 | ,075 | ,558 | ,063 |
|  | n | 33 | 33 | 33 | 33 | 33 | 30 |
| IOP | rs | ,207 | -,108 | 1,000 | ,036 | -,043 | ,041 | -,168 |
| p | ,247 | ,548 | ,843 | ,810 | ,822 | ,374 |
|  | n | 33 | 33 | 33 | 33 | 33 | 30 |
| c/d | rs | ,143 | -,211 | ,036 | 1,000 | -,087 | -,199 | -,198 |
| p | ,429 | ,239 | ,843 | ,629 | ,267 | ,294 |
|  | n | 33 | 33 | 33 | 33 | 33 | 30 |
| RNFL | rs | -,601** | ,314 | -,043 | -,087 | 1,000 | ,237 | -,070 |
| p | ,000 | ,075 | ,810 | ,629 | ,185 | ,712 |
|  | n | 33 | 33 | 33 | 33 | 33 | 30 |
| MT | rs | -,151 | ,106 | ,041 | -,199 | ,237 | 1,00 | -,065 |
| p | ,401 | ,558 | ,822 | ,267 | ,185 | ,734 |
|  | n | 33 | 33 | 33 | 33 | 33 | 30 |
| MD | rs | -,151 | ,265 | ,143 | -,119 | ,217 | ,013 | ,025 |
| p | ,402 | ,136 | ,427 | ,509 | ,226 | ,945 | ,895 |
|  | n | 33 | 33 | 33 | 33 | 33 | 33 | 30 |
| PSD | rs | ,090 | ,322 | -,022 | -,081 | -,049 | ,127 | -,281 |
| p | ,618 | ,068 | ,904 | ,656 | ,788 | ,483 | ,133 |
|  | n | 33 | 33 | 33 | 33 | 33 | 33 | 30 |
| Glu | rs | ,252 | -,344 | -,168 | -,198 | -,070 | -,065 | 1,000 |
| p | ,179 | ,063 | ,374 | ,294 | ,712 | ,734 |
|  | n | 30 | 30 | 30 | 30 | 30 | 30 |
| Ch | rs | ,011 | -,098 | ,313 | -,173 | ,017 | -,219 | -,220 |
| p | ,953 | ,594 | ,081 | ,344 | ,927 | ,228 | ,243 |
|  | n | 32 | 32 | 32 | 32 | 32 | 32 | 30 |

ESM_3: Correlation analysis between clinical and biochemical data showing non-parametric distributions in the patient group. rs: Spearman’s correlation coefficient, p: 2-tailed p value, C Vs: Color vision, IOP: Intraocular pressure, c/d: cup disc ratio, RNFL: Retinal nerve fiber layer analysis, MT: Macular thickness, MD: Mean deviation, PSD: Pattern standard deviation, Glu: Glucose, Ch: Choesterol. *: p<0.05 significant, **: p<0.01 very significant (Significant and very significant correlations are represented in light and dark grey, respectively).
